# Supplementary figures and images for: Dietary Supplementation of Lysophospholipids Affects Feed Digestion in Lambs
Source: MDPI journal article supplement (doi:10.3390/ani9100805), 2019-10-15

CON LPL

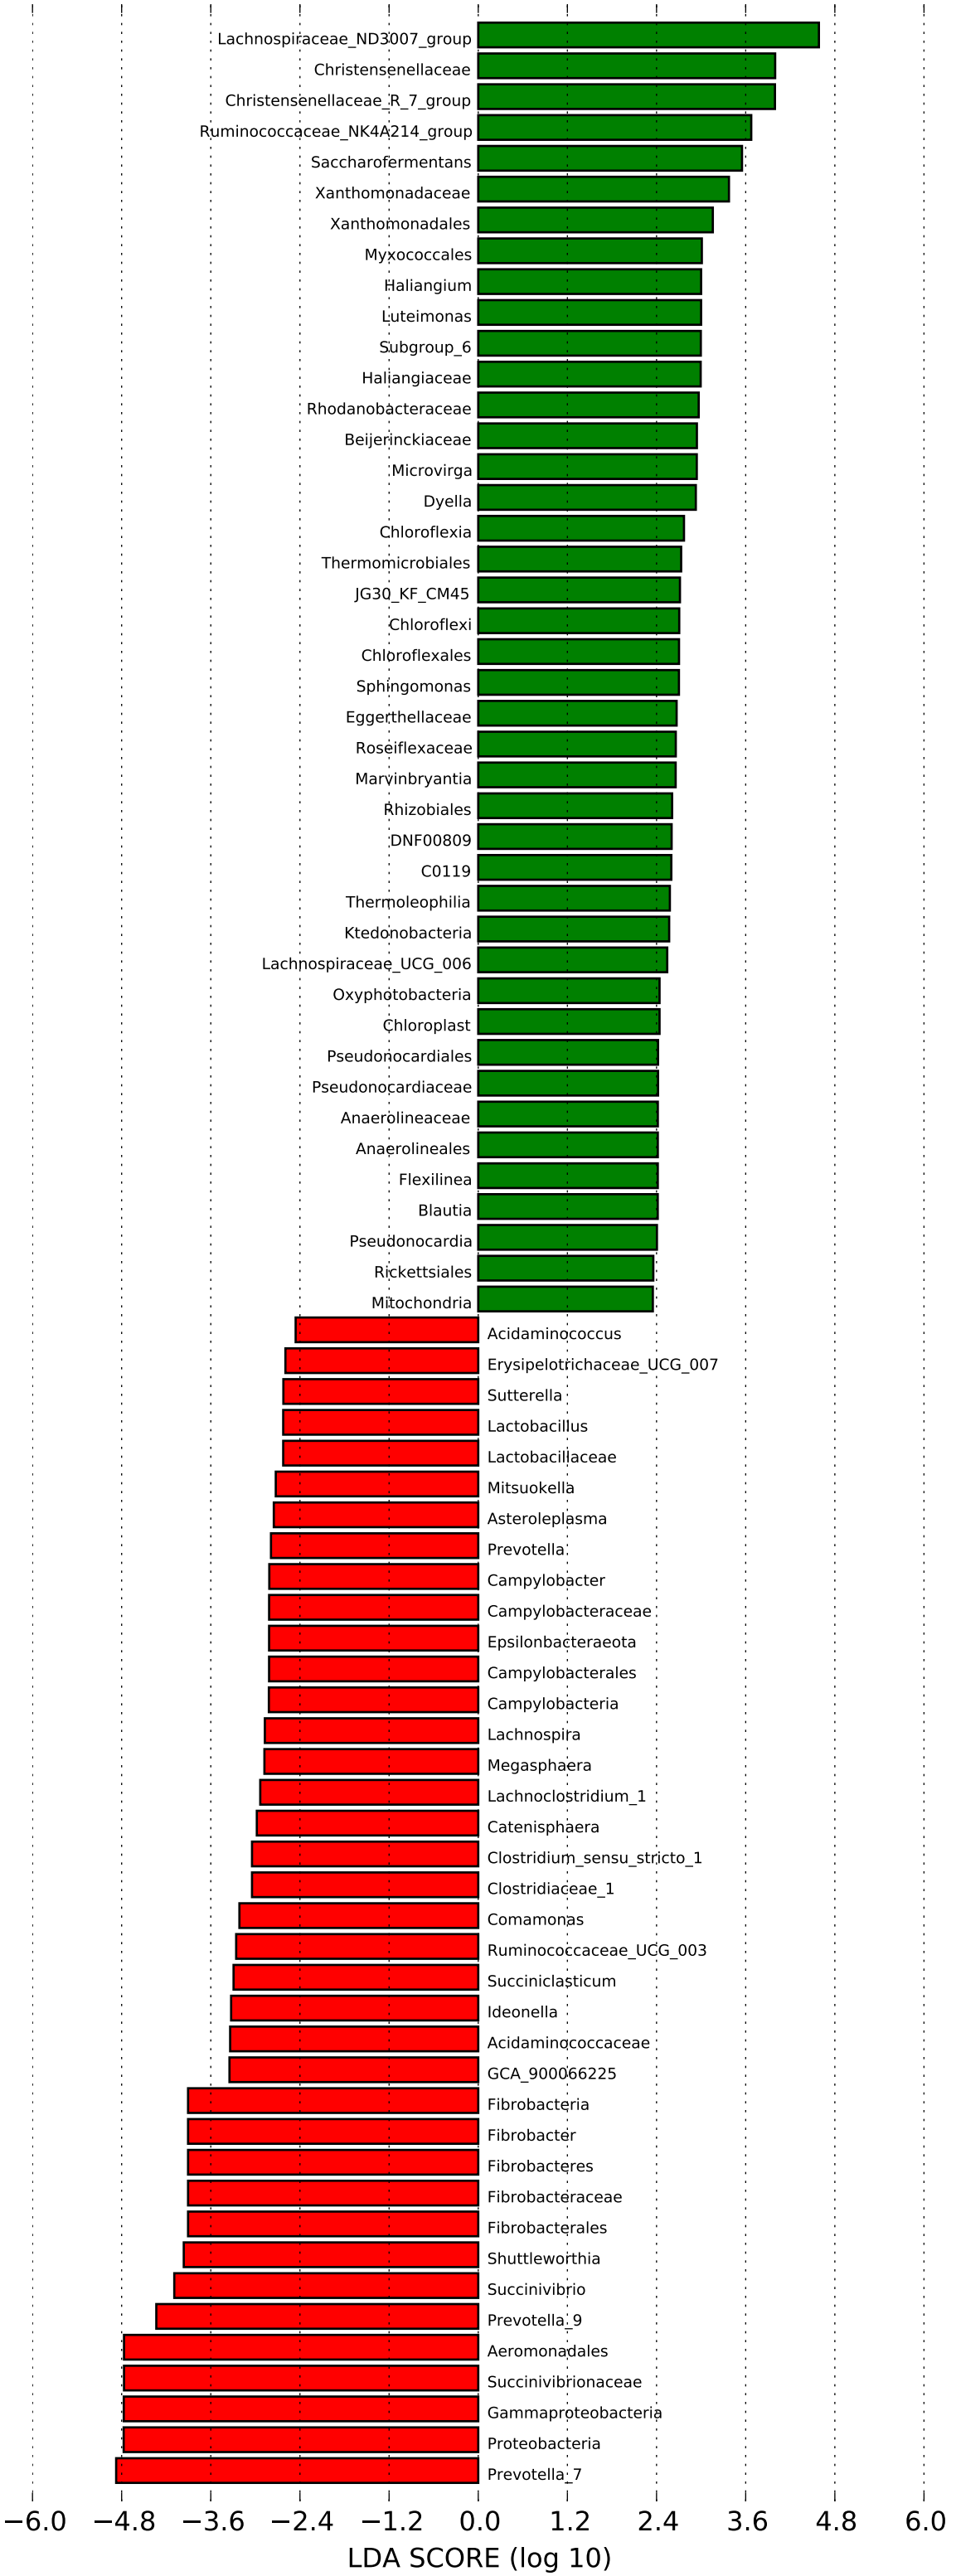

Supplement: s1 [file s1]

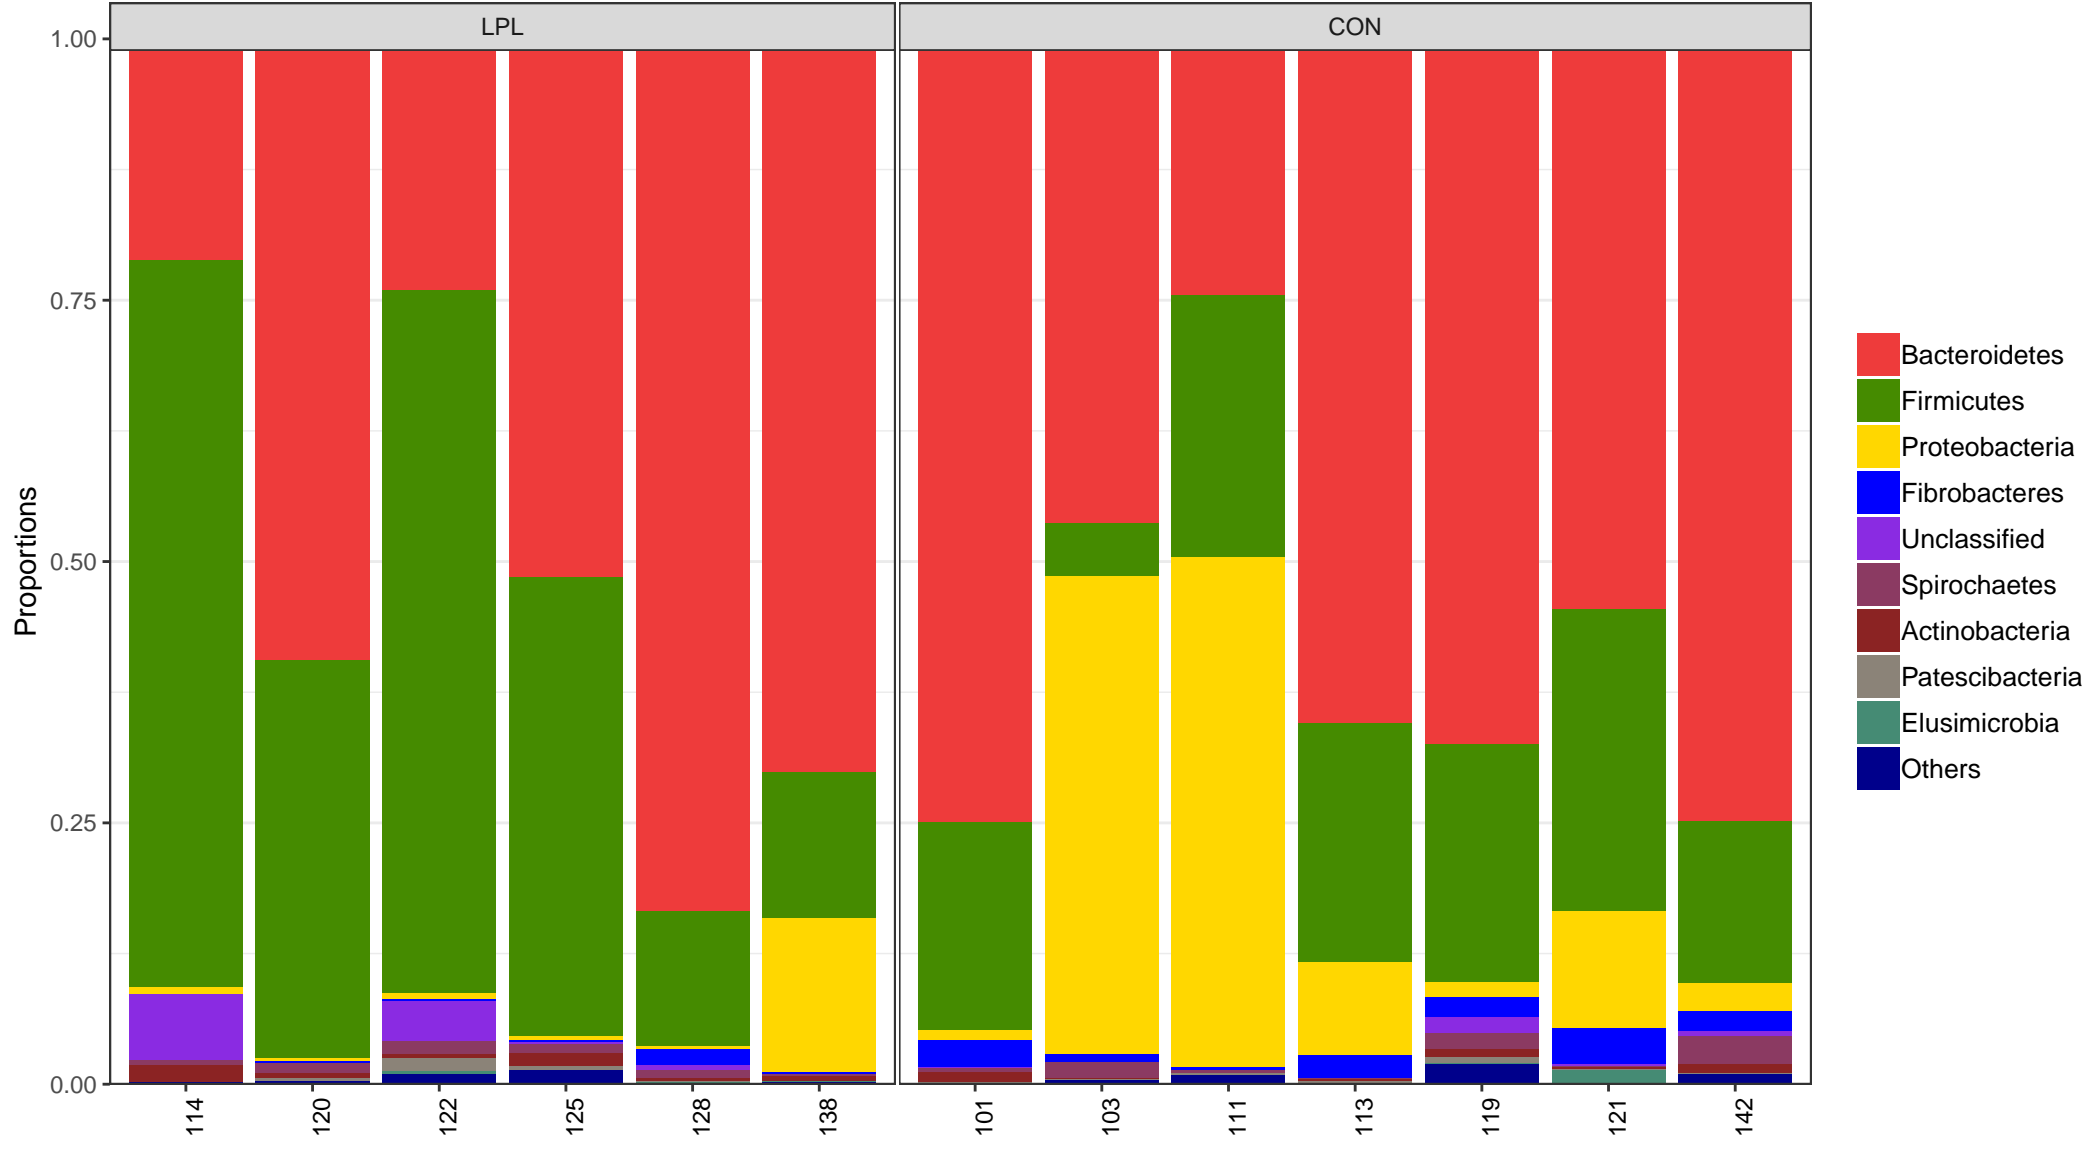

Supplement: s1 [file s1]
